# Supplementary material for: Changing consumption of resources for respiratory support and short-term outcomes in four consecutive geographical cohorts of infants born extremely preterm over 25 years since the early 1990s
Source: PubMed Central journal article supplement — BMJ Open. 2020 Sep 10;10(9):e037507. doi: 10.1136/bmjopen-2020-037507 (PMC7488838; doi:10.1136/bmjopen-2020-037507), 2020-09-10

**Supplementary Table 1: Consumption of resources for respiratory support in survivors to discharge home**

|                                                 | 1991-92<br>n=227 |                                                          | 1997<br>n=152   |                                                          | 2005<br>n=170   |                                                          | 2016-17<br>n=217<br>(reference) |
|-------------------------------------------------|------------------|----------------------------------------------------------|-----------------|----------------------------------------------------------|-----------------|----------------------------------------------------------|---------------------------------|
|                                                 | median<br>(IQR)  | Adj <sup>^</sup> diff.<br>medians<br>(95% CI)<br>p value | median<br>(IQR) | Adj <sup>^</sup> diff.<br>medians<br>(95% CI)<br>p value | median<br>(IQR) | Adj <sup>^</sup> diff.<br>medians<br>(95% CI)<br>p value | median<br>(IQR)                 |
| All respiratory support <sup>&amp;</sup> (days) | 30 (17-45)       | -35 (-40, -30)<br>p<0.001                                | 48 (31-63)      | -24 (-29, -19)<br>p<0.001                                | 44 (25-73)      | -19 (-24, -14)<br>p<0.001                                | 70 (51-88)                      |
| Invasive ventilation <sup>#</sup> (days)        | 21 (8-34)        | 11 (8, 14)<br>p<0.001                                    | 19 (8-32)       | 5 (1, 8)<br>p=0.01                                       | 10 (3-26)       | 2 (-2, 5)<br>p=0.33                                      | 9 (1-30)                        |
| Non-invasive ventilation <sup>§</sup> (days)    | 5 (0-12)         | -45 (-49, -41)<br>p<0.001                                | 24 (14-36)      | -29 (-33, -25)<br>p<0.001                                | 32 (17-42)      | -20 (-24, -16)<br>p<0.001                                | 53 (39-66)                      |
| nCPAP (days)                                    | 5 (0-12)         | -19 (-23, -16)<br>p<0.001                                | 24 (14-36)      | -2 (-6, 2)<br>p=0.25                                     | 32 (17-42)      | 6 (3, 10)<br>p=0.001                                     | 28 (15-40)                      |
| HFNC (days)                                     | -                | -                                                        | -               | -                                                        | -               | -                                                        | 23 (15-33)                      |

|                                   |                     |                         |              |                          |                      |                       |                      |
|-----------------------------------|---------------------|-------------------------|--------------|--------------------------|----------------------|-----------------------|----------------------|
| Supplemental oxygen (days)        | 62 (34-96)<br>n=226 | -7 (-18, 3)<br>p=0.17   | 47 (12-88)   | -17 (-29, -6)<br>p=0.003 | 67 (20-114)<br>n=167 | -9 (-21, 2)<br>p=0.10 | 84 (44-121)<br>n=184 |
| Primary hospital admission (days) | 94 (78-112)         | -7 (-12, -3)<br>p=0.002 | 101 (81-110) | -8 (-13, -3)<br>p=0.003  | 106 (88-134)         | 3 (-2, 8)<br>p=0.19   | 108 (85-133)         |

Diff. medians = Difference in medians; IQR = interquartile range; nCPAP = nasal continuous positive airway pressure; HFNC = high flow nasal cannulae.

^Adjusted for inborn status (i.e. birth in a tertiary perinatal centre), gestation at birth, sex, birthweight z-score.

&Includes positive pressure ventilation via endotracheal tube, high frequency oscillatory ventilation, nCPAP and HFNC.

#Includes positive pressure ventilation via endotracheal tube, high frequency oscillatory ventilation.

§Includes nCPAP and HFNC.

2016-17 cohort as a reference for all comparisons.

**Supplementary Table 2: Duration of respiratory support, oxygen therapy, and hospitalisation in those who received intensive care (23 – 27 weeks only)**

|                                                 | 1991-92<br>n=330   |                                                          | 1997<br>n=188       |                                                          | 2005<br>n=226        |                                                          | 2016-17<br>n=250<br>(reference) |
|-------------------------------------------------|--------------------|----------------------------------------------------------|---------------------|----------------------------------------------------------|----------------------|----------------------------------------------------------|---------------------------------|
|                                                 | median<br>(IQR)    | Adj <sup>^</sup> diff.<br>medians<br>(95% CI)<br>p value | median<br>(IQR)     | Adj <sup>^</sup> diff.<br>medians<br>(95% CI)<br>p value | median<br>(IQR)      | Adj <sup>^</sup> diff.<br>medians<br>(95% CI)<br>p value | median<br>(IQR)                 |
| All respiratory support <sup>&amp;</sup> (days) | 23 (4-41)          | -36 (-41, -30)<br>p<0.001                                | 42 (21-61)          | -24 (-30, -18)<br>p<0.001                                | 38 (16-69)           | -23 (-29, -17)<br>p<0.001                                | 66 (43-88)<br>n=247             |
| Invasive ventilation <sup>#</sup> (days)        | 16 (3-31)          | 8 (4, 12)<br>p<0.001                                     | 15 (5-30)           | 4 (-1, 8)<br>p=0.11                                      | 10 (2-27)            | 2 (-3, 6)<br>p=0.40                                      | 9 (1-29)<br>n=247               |
| Non-invasive ventilation <sup>§</sup> (days)    | 2 (0-9)            | -48 (-52, -44)<br>p<0.001                                | 21 (8-36)           | -29 (-34, -25)<br>p<0.001                                | 26 (6-41)            | -24 (-28, -20)<br>p<0.001                                | 51 (33-64)<br>n=247             |
| nCPAP (days)                                    | 2 (0-9)            | -23 (-27, -19)<br>p<0.001                                | 21 (8-36)           | -4 (-9, 0.3)<br>p=0.07                                   | 26 (6-41)            | 0.5 (-4, 5)<br>p=0.81                                    | 25 (9-39)<br>n=247              |
| HFNC (days)                                     | -                  | -                                                        | -                   | -                                                        | -                    | -                                                        | 21 (11-31)<br>n=247             |
| Supplemental oxygen (days)                      | 44 (5-86)<br>n=327 | -19 (-33, -5)<br>p=0.01                                  | 47 (12-88)<br>n=184 | -23 (-39, -7)<br>p=0.01                                  | 57 (13-108)<br>n=214 | -16 (-31, -1)<br>p=0.04                                  | 74 (30-120)<br>n=203            |

|                                    |             |                          |             |                        |             |                      |                       |
|------------------------------------|-------------|--------------------------|-------------|------------------------|-------------|----------------------|-----------------------|
| Primary hospital admission* (days) | 83 (21-104) | -13 (-20, -6)<br>p<0.001 | 93 (69-112) | -9 (-16, -1)<br>p=0.03 | 97 (72-128) | -1 (-9, 6)<br>p=0.72 | 100 (78-128)<br>n=249 |
|------------------------------------|-------------|--------------------------|-------------|------------------------|-------------|----------------------|-----------------------|

Diff. medians = Difference in medians; IQR = interquartile range; nCPAP = nasal continuous positive airway pressure; HFNC = high flow nasal cannulae.

^Adjusted for inborn status (i.e. birth in a tertiary perinatal centre), gestation at birth, sex, birthweight z-score.

&Includes positive pressure ventilation via endotracheal tube, high frequency oscillatory ventilation, nCPAP and HFNC.

#Includes positive pressure ventilation via endotracheal tube, high frequency oscillatory ventilation.

§Includes nCPAP and HFNC.

\*Until discharge home.

2016-17 cohort as a reference for all comparisons.

**Supplementary Table 3: Survival to discharge home, treatments, and morbidities of those receiving intensive care (23-27 weeks only)**

|                                         | 1991-92<br>n=330  |                              | 1997<br>n=188    |                              | 2005<br>n=226     |                              | 2016-17<br>n=250<br>(reference) |
|-----------------------------------------|-------------------|------------------------------|------------------|------------------------------|-------------------|------------------------------|---------------------------------|
|                                         | n (%)             | OR (95% CI)<br>p value       | n (%)            | OR (95% CI)<br>p value       | n (%)             | OR (95% CI)<br>p value       | n (%)                           |
| Survival to discharge home              | 227 (68.8)        | 0.24 (0.15, 0.39)<br>p<0.001 | 151 (80.3)       | 0.61 (0.35, 1.06)<br>p=0.08  | 169 (74.8)        | 0.41 (0.25, 0.68)<br>p=0.001 | 217 (86.8)                      |
| Surfactant                              | 150 (45.5)        | 0.19 (0.12, 0.28)<br>p<0.001 | 161 (85.6)       | 1.26 (0.75, 2.12)<br>p=0.38  | 202 (89.4)        | 1.94 (1.13, 3.35)<br>p=0.02  | 202/247<br>(81.8)               |
| IVH 3 or 4                              | 44 (13.3)         | 1.46 (0.85, 2.52)<br>p=0.17  | 19 (10.1)        | 1.01 (0.53, 1.94)<br>p=0.97  | 33 (14.6)         | 1.56 (0.87, 2.77)<br>p=0.13  | 27/249 (10.8)                   |
| cPVL                                    | 21 (6.4)          | 5.50 (1.63, 18.6)<br>p=0.01  | 11 (5.9)         | 5.14 (1.37, 19.3)<br>p=0.02  | 6 (2.7)           | 2.25 (0.55, 9.22)<br>p=0.26  | 3 (1.2)                         |
| NEC                                     | 30/330<br>(9.1)   | 0.57 (0.34, 0.97)<br>p=0.04  | 12 (6.4)         | 0.36 (0.18, 0.73)<br>p=0.004 | 32 (14.2)         | 0.93 (0.55, 1.58)<br>p=0.80  | 37 (14.8)                       |
| ROP received treatment <sup>&amp;</sup> | 13/329<br>(4.0)   | 0.48 (0.22, 1.03)<br>p=0.06  | 11/185<br>(5.9)  | 0.52 (0.23, 1.18)<br>p=0.12  | 10/217 (4.6)      | 0.41 (0.18, 0.96)<br>p=0.04  | 25/249 (10.0)                   |
| BPD (Oxygen at 36 weeks) <sup>#</sup>   | 116/237<br>(49.0) | 1.21 (0.80, 1.81)<br>p=0.37  | 67/152<br>(44.1) | 0.75 (0.47, 1.22)<br>p=0.25  | 105/181<br>(58.0) | 1.64 (1.07, 2.51)<br>p=0.02  | 108/220<br>(49.1)               |

|                           |            |                             |           |                             |           |                             |           |
|---------------------------|------------|-----------------------------|-----------|-----------------------------|-----------|-----------------------------|-----------|
| Postnatal corticosteroids | 108 (32.7) | 1.21 (0.83, 1.76)<br>p=0.33 | 80 (42.6) | 1.51 (0.98, 2.34)<br>p=0.06 | 54 (23.9) | 0.65 (0.42, 1.01)<br>p=0.06 | 77 (30.8) |
| Surgery                   | 77 (23.3)  | 0.95 (0.64, 1.42)<br>p=0.81 | 52 (27.7) | 1.06 (0.68, 1.68)<br>p=0.79 | 70 (31.0) | 1.36 (0.89, 2.08)<br>p=0.15 | 62 (24.8) |

OR = odds ratio; IVH 3 or 4 = intraventricular haemorrhage grade 3 or 4; cPVL = cystic periventricular leukomalacia; NEC = necrotising enterocolitis Bell Stage 2 or worse; ROP = retinopathy of prematurity; BPD = bronchopulmonary dysplasia.

^Adjusted for inborn status (i.e. birth in a tertiary perinatal centre), gestation at birth, sex, birthweight z-score.

&Laser or cryotherapy (1991-92, 1997, and 2005); Bevacizumab injections and/or laser therapy (2016-17).

#Denominator – alive at 36 weeks' postmenstrual age 2016-17 cohort as a reference for all comparisons.

**Supplementary Figure 1** Proportions of infants receiving intensive care among all livebirths free of lethal anomalies (Supplementary Figure 1a), those alive at discharge as a percentage of livebirths free of lethal anomalies (Supplementary Figure 1b) and as a percentage of those offered intensive care (Supplementary Figure 1c) in gestational age groups across the four eras. Denominators provided above each bar. Absolute numbers <5 not provided as per the policy of the Consultative Council on Obstetric and Paediatric Mortality and Morbidity (CCOPMM) in Victoria, from where some of the data were sourced.

Supplementary Figure 1a

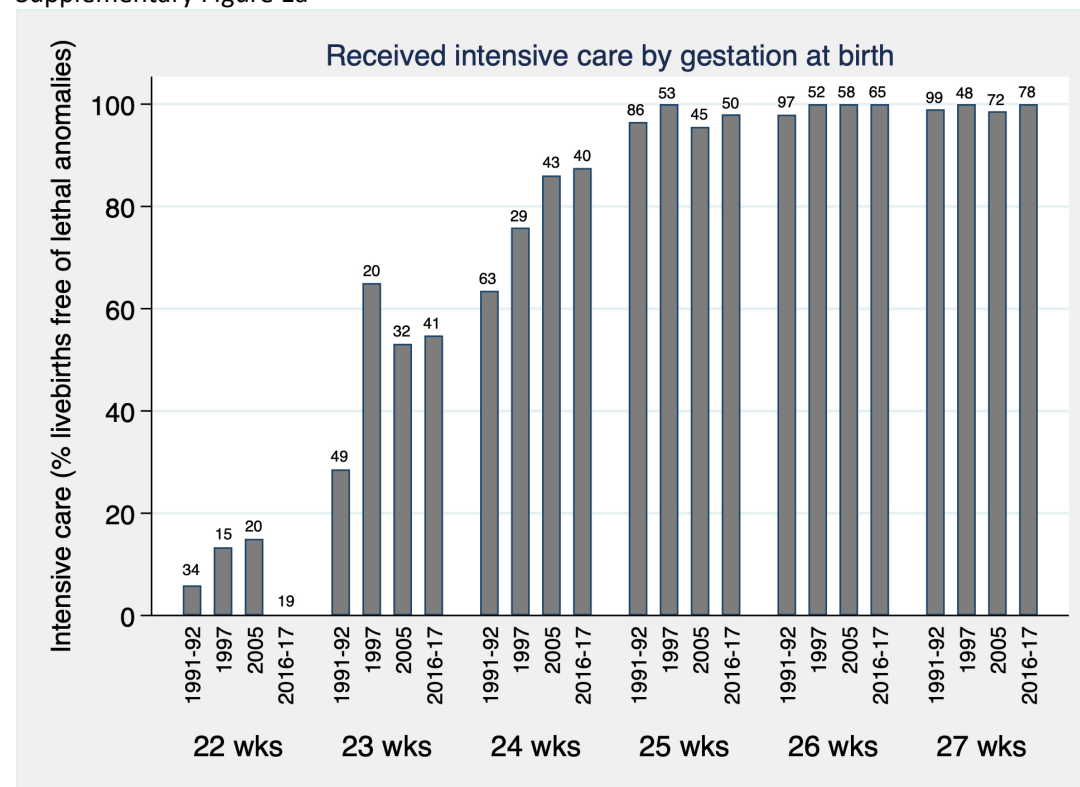

Supplementary Figure 1b

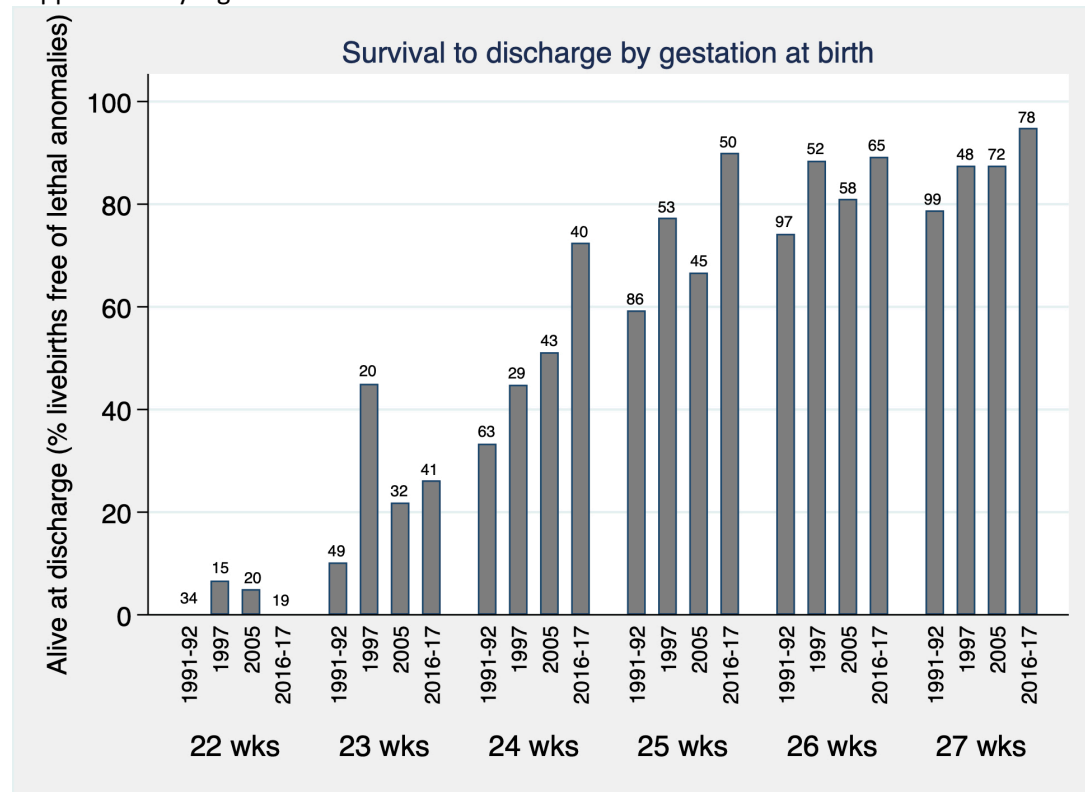



Supplementary Figure 1c

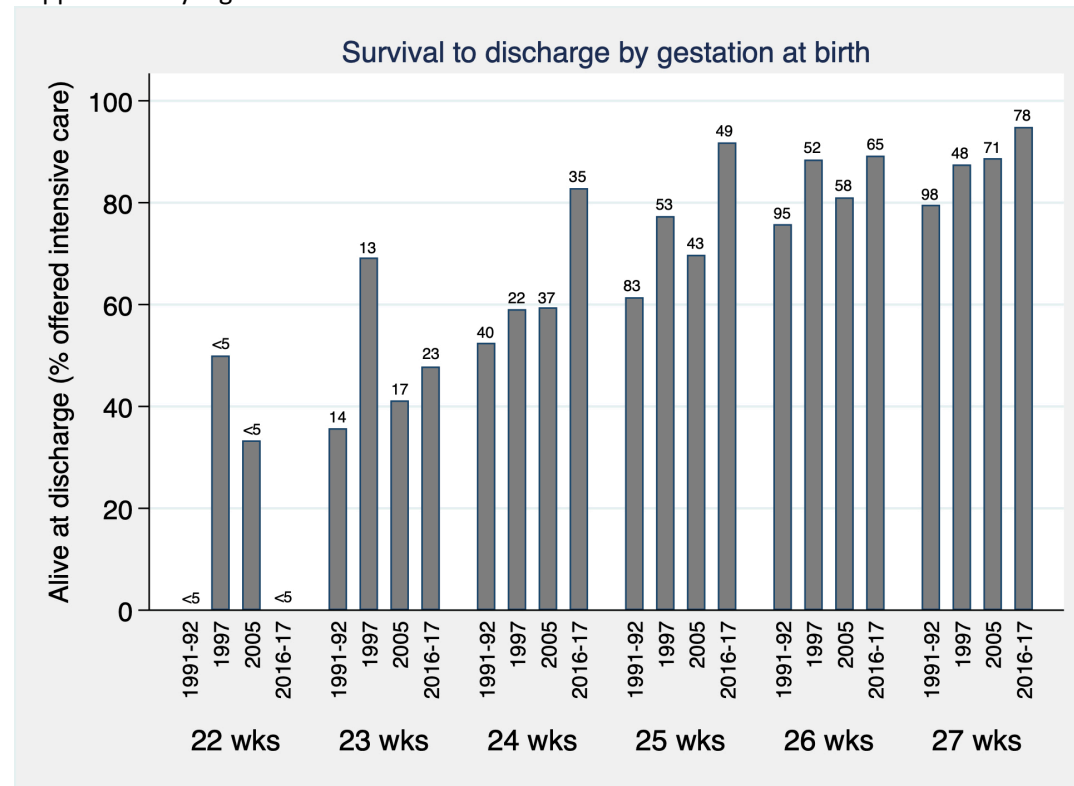

Supplement: bmjopen-2020-037507supp001.pdf [file bmjopen-2020-037507supp001.pdf]
